# Supplementary material
Source: PubMed Central journal article supplement (PMC10273798)
Supplement: sj-pdf-1-bji-10.1177_17571774231159388.pdf [file sj-pdf-1-bji-10.1177_17571774231159388.pdf]

| Study                | Summary Score |
|----------------------|---------------|
| Penno et al 2017     | 8             |
| Wong et al 2016      | 8             |
| Simmons et al 2018   | 6             |
| Villacis et al 2019  | 8             |
| Hoesin et al 2016    | 7             |
| Beal et al 2016      | 6             |
| Green et al 2017     | 8             |
| Ali et al 2017       | 8             |
| Kitagawa et al 2020  | 7             |
| Zeber et al 2018     | 9             |
| Jinadatha et al 2014 | 7             |
| Boyce et al 2011     | 8             |
| <b>Average Score</b> | <b>7.5</b>    |

Supplementary Table 2. Summary of modified GRACE scores for all eligible studies

GRACE scores were calculated based on yes/no evaluation of 9 out of 11 relevant assessment questions.

A 10<sup>th</sup> assessment was added to subtract one point for studies where potential competing interests were determined
